# Supplementary material for: Using Decision Science for Monitoring Threatened Western Snowy Plovers to Inform Recovery
Source: MDPI journal article supplement (doi:10.3390/ani11020569), 2021-02-22
Supplement: s1 [file s1]

Using Decision Science for Monitoring Threatened Western Snowy Plovers to Inform Recovery  
Bruce G. Marcot, James E. Lyons, Daniel C. Elbert, and Laura Todd

Supplementary Appendix 7. Names and affiliations of the Western Snowy Plover Technical Team members and expert panelists providing information and scoring of monitoring performance of the alternative monitoring strategies. The collective expertise of members included analysis and modeling of wildlife populations, monitoring of Western Snowy Plover populations, shorebird ecology and behavior, and endangered species recovery.

| Name           | Affiliation                                      | Title                                                                                                   |
|----------------|--------------------------------------------------|---------------------------------------------------------------------------------------------------------|
| Scott Pearson  | Washington<br>Department of Fish and<br>Wildlife | Senior Researcher                                                                                       |
| Eleanor Gaines | Oregon Biodiversity<br>and Information<br>Center | Director and Zoologist                                                                                  |
| Dave Lauten    | Oregon Biodiversity<br>and Information<br>Center | Faculty Research<br>Assistant                                                                           |
| Gary Page      | Point Blue<br>Conservation Science               | Biologist                                                                                               |
| Lynne Stenzel  | Point Blue<br>Conservation Science               | Senior Wetland<br>Ecologist                                                                             |
| Jim Watkins    | U.S. Fish and Wildlife<br>Service                | Rangewide Species<br>Lead Biologist for the<br>western snowy plover                                     |
| Daniel Elbert  | U.S. Fish and Wildlife<br>Service                | Recovery Unit 1<br>(Washington and<br>Oregon) Species Lead<br>Biologist for the<br>western snowy plover |
| Laura Todd     | U.S. Fish and Wildlife<br>Service                | Field Supervisor                                                                                        |
