# Supplementary material for: Using Decision Science for Monitoring Threatened Western Snowy Plovers to Inform Recovery
Source: MDPI journal article supplement (doi:10.3390/ani11020569), 2021-02-22
Supplement: s1 [file s1]

Using Decision Science for Monitoring Threatened Western Snowy Plovers to Inform Recovery  
Bruce G. Marcot, James E. Lyons, Daniel C. Elbert, and Laura Todd

Supplemental Appendix 4. Form for scoring performance measures of monitoring objectives under monitoring sampling strategies. Values follow the scoring scales in Supplemental Appendix 2, with examples of entries from one team member shown here.

| Monitoring Objective                                                                                                                                                                                                                                                                                                                                                                              | Performance Measure                                       | Sampling Strategy                     |                            |                                          |                         |                                  |                       |                      |                             |                 |
|---------------------------------------------------------------------------------------------------------------------------------------------------------------------------------------------------------------------------------------------------------------------------------------------------------------------------------------------------------------------------------------------------|-----------------------------------------------------------|---------------------------------------|----------------------------|------------------------------------------|-------------------------|----------------------------------|-----------------------|----------------------|-----------------------------|-----------------|
|                                                                                                                                                                                                                                                                                                                                                                                                   |                                                           | A. Partially Marked Population (>50%) | B. Varied Population Sizes | C. Variable Plover Densities & Mgt Needs | D. Minimum I Marked Pop | E. Minimal II Effort / Resources | F. Marked Individuals | G. Marked Population | H. Mostly Marked Population | I. Nest Focused |
| 1. Maximize accuracy of estimated adult population size                                                                                                                                                                                                                                                                                                                                           | Accuracy (bias and precision)                             | 3                                     | 3                          | 3                                        | 3                       | 2                                | 5                     | 5                    | 3                           | 2               |
| 2. Maximize accuracy of estimated fledging productivity                                                                                                                                                                                                                                                                                                                                           | Accuracy (bias and precision)                             | 3                                     | 5                          | 3                                        | 2                       | 2                                | 2                     | 5                    | 4                           | 1               |
| 3. Maximize accuracy of estimated annual survival of adults and juveniles                                                                                                                                                                                                                                                                                                                         | Accuracy (bias and precision)                             | 4                                     | 3                          | 3                                        | 3                       | 3                                | 5                     | 4                    | 4                           | 3               |
| 4.1 Maximize accuracy of estimated nest success                                                                                                                                                                                                                                                                                                                                                   | Accuracy (bias and precision)                             | 2                                     | 4                          | 3                                        | 2                       | 2                                | 3                     | 5                    | 5                           | 5               |
| 4.2 Minimize percent failures attributed to unknown cause                                                                                                                                                                                                                                                                                                                                         | Effectiveness when identifying causes of nest failure     | 3                                     | 4                          | 3                                        | 3                       | 3                                | 2                     | 3                    | 5                           | 4               |
| 4.3 Minimize % of predation events attributed to unidentified predators                                                                                                                                                                                                                                                                                                                           | Effectiveness when apportioning sources of nest predation | 3                                     | 4                          | 3                                        | 3                       | 3                                | 2                     | 3                    | 5                           | 4               |
| 5.1 Maximize actionable information available to managers: Timeliness                                                                                                                                                                                                                                                                                                                             | Timeliness of Information                                 | 3                                     | 3                          | 2                                        | 3                       | 1                                | 3                     | 3                    | 3                           | 3               |
| 5.2 Maximize actionable information available to managers: Availability                                                                                                                                                                                                                                                                                                                           | Availability of Information                               | 2                                     | 2                          | 1                                        | 2                       | 2                                | 2                     | 2                    | 1                           | 2               |
|                                                                                                                                                                                                                                                                                                                                                                                                   |                                                           | Sampling Strategy                     |                            |                                          |                         |                                  |                       |                      |                             |                 |
| <b>Instructions for Scoring Costs:</b><br>FIRST, put 100 in the cell for the most expensive strategy. SECOND, fill in the other cells with a number between 1 and 100; ties are allowed. Provide scores relative to the most expensive strategy (100); for example, if a strategy would cost one-half as much as the most expensive strategy, enter 50 in the cell for the cost of that strategy. |                                                           | A. Partially Marked Population (>50%) | B. Varied Population Sizes | C. Variable Plover Densities & Mgt Needs | D. Minimum I Marked Pop | E. Minimal II Effort / Resources | F. Marked Individuals | G. Marked Population | H. Mostly Marked Population | I. Nest Focused |
| 6. Cost                                                                                                                                                                                                                                                                                                                                                                                           | Relative cost                                             | 70                                    | 90                         | 80                                       | 65                      | 65                               | 80                    | 100                  | 95                          | 80              |
