# Supplementary material for: Using Decision Science for Monitoring Threatened Western Snowy Plovers to Inform Recovery
Source: Animals (Basel). 2021 Feb 22;11(2):569. doi: 10.3390/ani11020569 (PMC7926560; doi:10.3390/ani11020569)
Supplement: Supplementary file 1 [file animals-11-00569-s001.zip]

Archive with 7 entries (7 files):
- Supplemental Appendix 1 Recovery Criteria.pdf
- Supplemental Appendix 2 Constructed Scales.pdf
- Supplemental Appendix 3 Sampling Strategies.pdf
- Supplemental Appendix 4 Form for Scoring.pdf
- Supplemental Appendix 5 Rationale Provided by Team Members.pdf
- Supplemental Appendix 6 Parameters of Utility Functions.pdf
- Supplemental Appendix 7 Panelists.pdf
